# Supplementary material
Source: publisher figshare collection journal article supplement (https://acs.figshare.com/ndownloader/files/8395685)
Supplement: Supplementary file 1 [file 8395685]

**Removal of Confined Ionic Liquid From A Metal Organic Framework By Extraction  
With Molecular Solvents.**

Manish P. Singh<sup>1</sup> Nilesh R. Dhumal,<sup>2</sup> Hyung J. Kim,<sup>2,3</sup> Johannes Kiefer,<sup>1,4</sup> James A. Anderson,<sup>1\*</sup>

<sup>1</sup>Chemical and Materials Engineering Group, School of Engineering, University of Aberdeen,  
Aberdeen, UK, AB24 3UE.

<sup>2</sup>Department of Chemistry, Carnegie Mellon University, Pittsburgh, PA 15213, USA.

<sup>3</sup>School of Computational Sciences, Korea Institute for Advanced Study, Seoul 02455, Korea.

<sup>4</sup>Technische Thermodynamik and MAPEX Center for Materials and Processes, Universität  
Bremen, Bremen 28359, Germany.

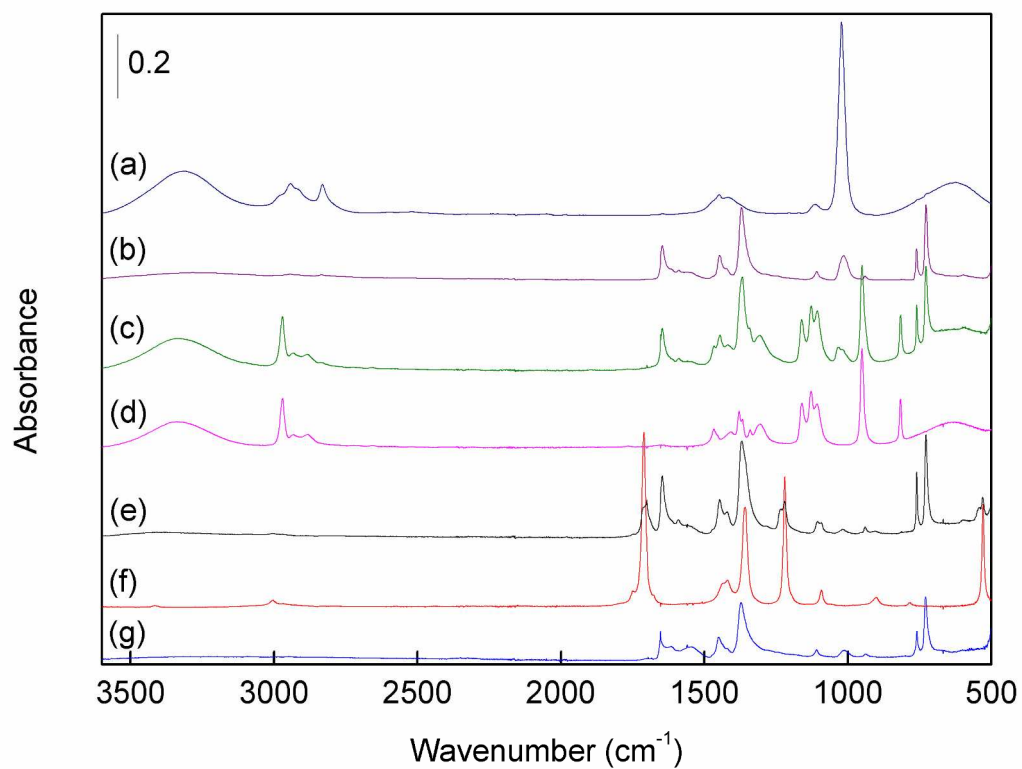

Fig. S1 FTIR spectra of confined solvent in CuBTC MOF: (a) Methanol, (b) CuBTC with methanol, (c) CuBTC with isopropanol, (d) isopropanol, (e) CuBTC with acetone, (f) acetone, and (g) pristine CuBTC.

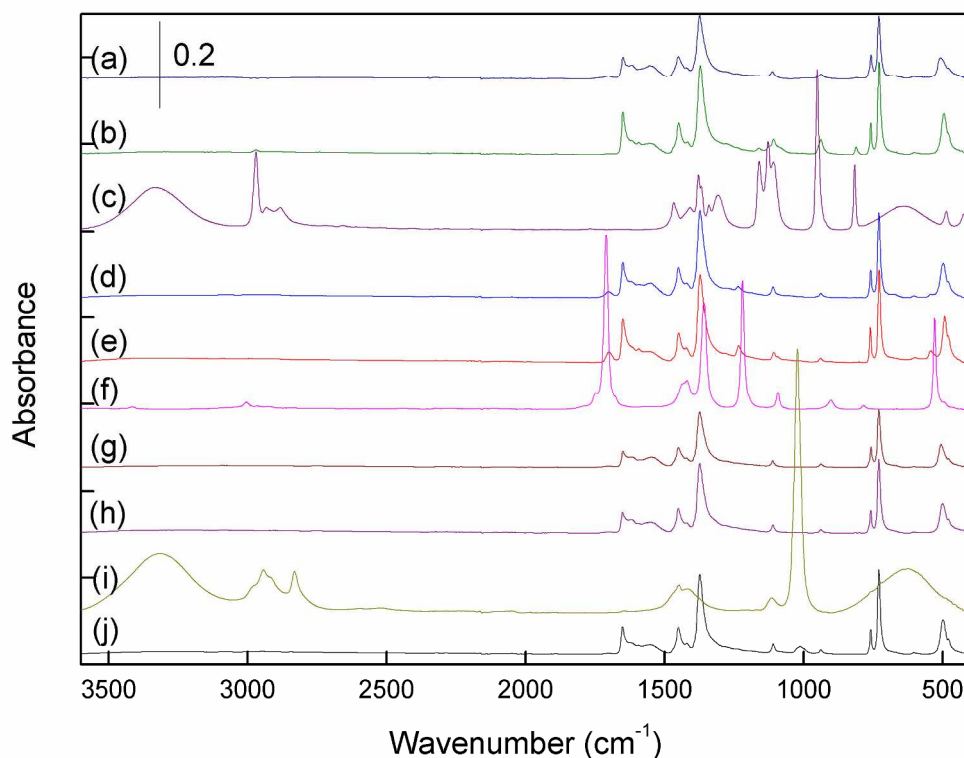

Fig. S2. FTIR spectra of pristine and CuBTC washed with solvents and dried for 24 h (a) CuBTC washed with isopropanol and dried at 150 °C, (b) CuBTC washed with isopropanol and dried at 70 °C, (c) pure isopropanol, (d) washed with acetone and dried CuBTC at 150 °C, (e) washed with acetone and dried CuBTC at 70 °C, (f) pure acetone, (g) washed CuBTC with methanol and dried at 150 °C, (h) washed CuBTC with methanol and dried at 70 °C, (i) methanol, and (j) pristine CuBTC

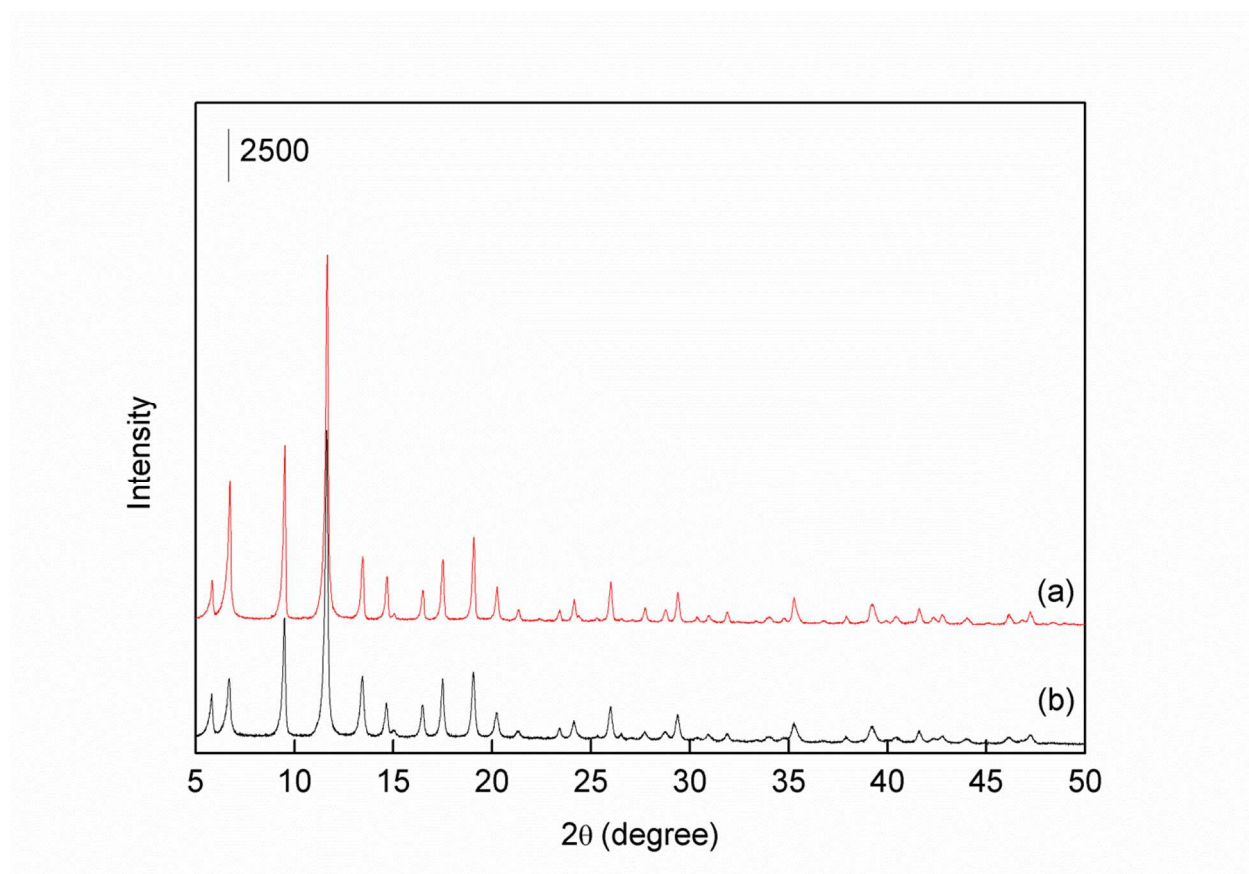

Fig. S3 PXRD pattern of IL extracted CuBTC with methanol (a) pristine CuBTC, (b) CuBTC after washing with methanol and dried at 70°C for 24 h.

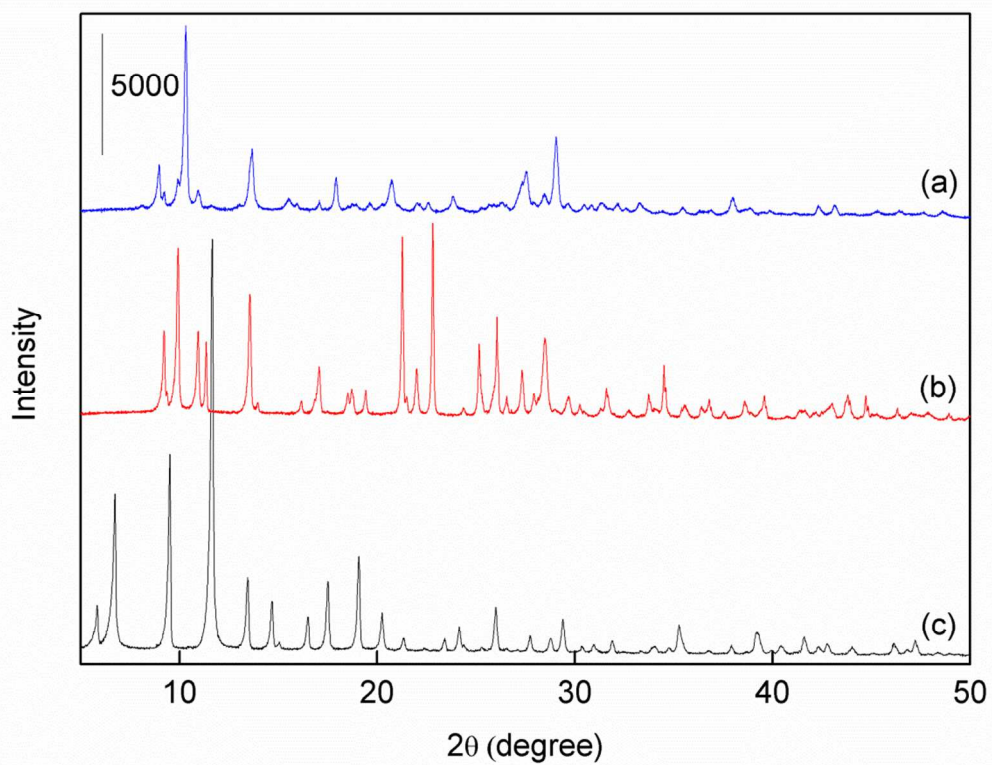

Fig. S4 PXRD patterns of CuBTC after holding 5h in water filtered and dried (a) at 150°C for 24 h, (b) at 70°C for 24 h, and (c) pristine CuBTC

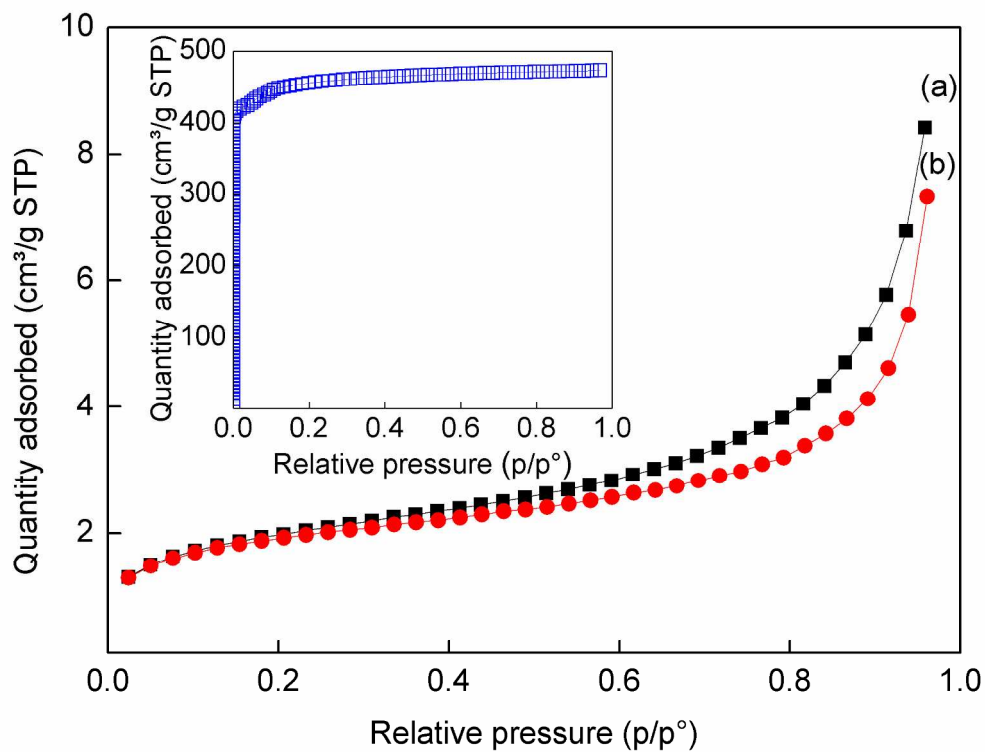

Fig. S5 Nitrogen adsorption isotherms of CuBTC and IL removed CuBTC. (a) pre-treated at 70°C for 24 h (b) pre-treated at 150°C for 24 h. Inset shows N<sub>2</sub> adsorption isotherms of pristine CuBTC pre-treated at 150°C for 24 h.

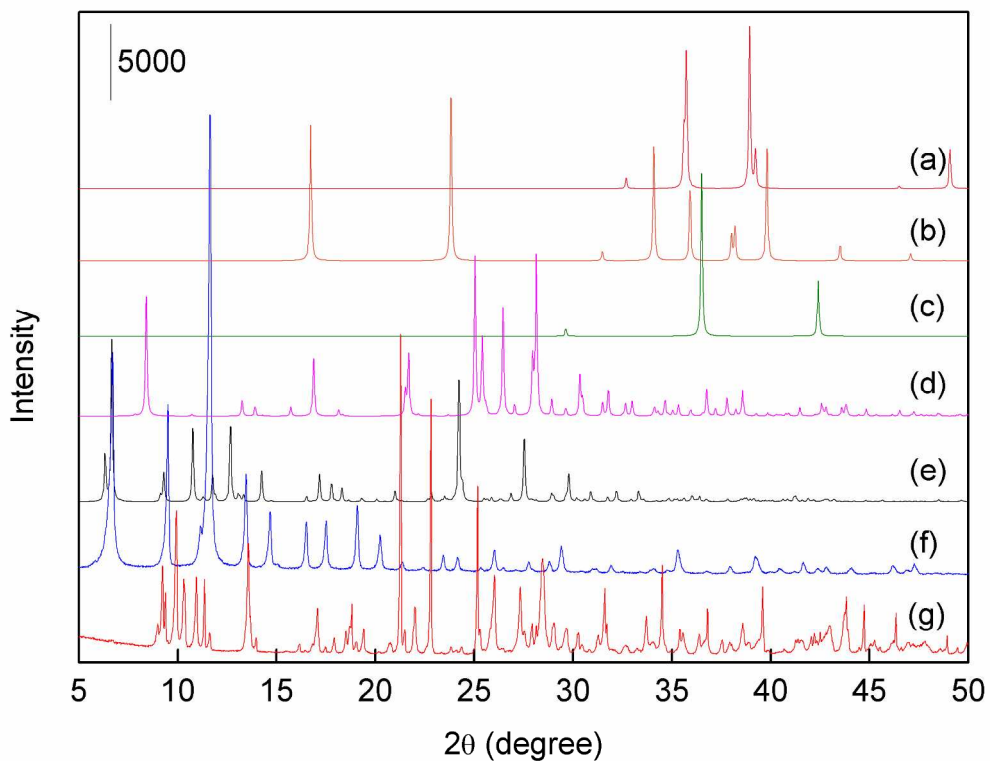

Fig. S6A Comparison of XRD pattern (a)  $\text{CuO}^1$ , (b)  $\text{Cu}(\text{OH})_2^1$ , (c)  $\text{Cu}_2\text{O}^1$ , (d) 1,3,5-benzene try carboxylic acid with two water molecules<sup>2</sup>, ( $\text{C}_6\text{H}_3(\text{CO}_2\text{H})_3 \cdot 2\text{H}_2\text{O}$ ), (e) 1,3,5-benzene try carboxylic acid<sup>3</sup>, ( $\text{C}_6\text{H}_3(\text{CO}_2\text{H})_3$ ), (f) activated CuBTC, and (g) IL impregnated CuBTC after washing with water.

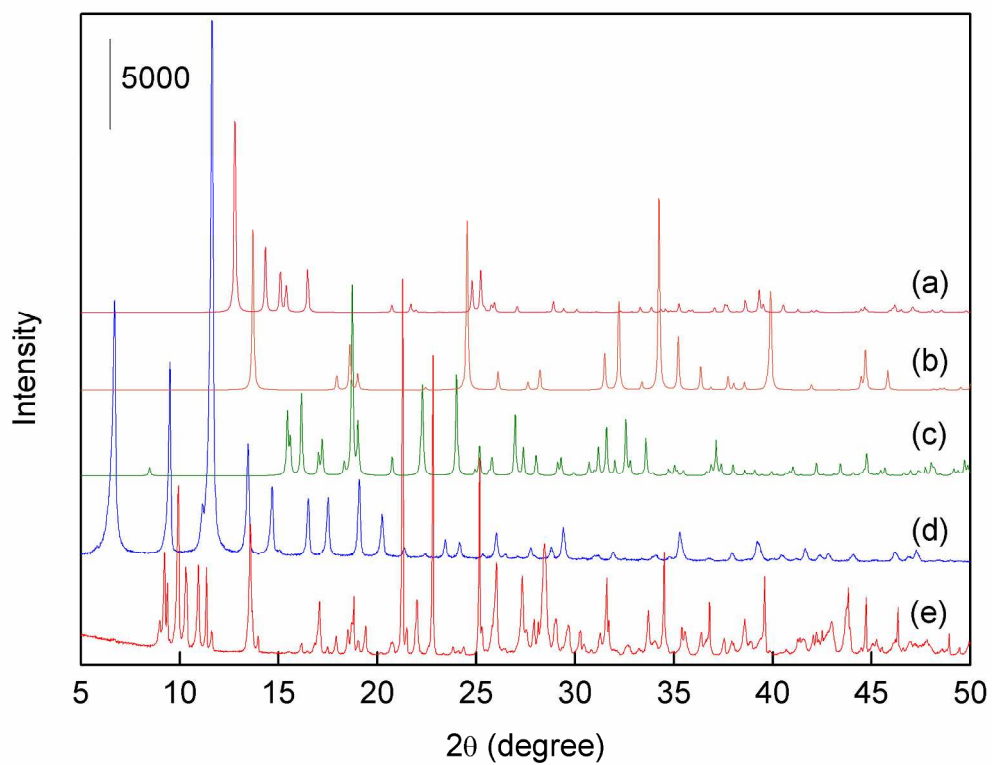

Fig. S6B Comparison of XRD pattern (a)  $\text{Cu}_2(\text{CH}_3\text{CO}_2)_4 \cdot 2\text{H}_2\text{O}$ , (b)  $\text{Cu}_2\text{SO}_4$ , (c)  $\text{CuSO}_4 \cdot 5\text{H}_2\text{O}$ , (d) activated CuBTC, and (e) IL impregnated CuBTC after washing with water.



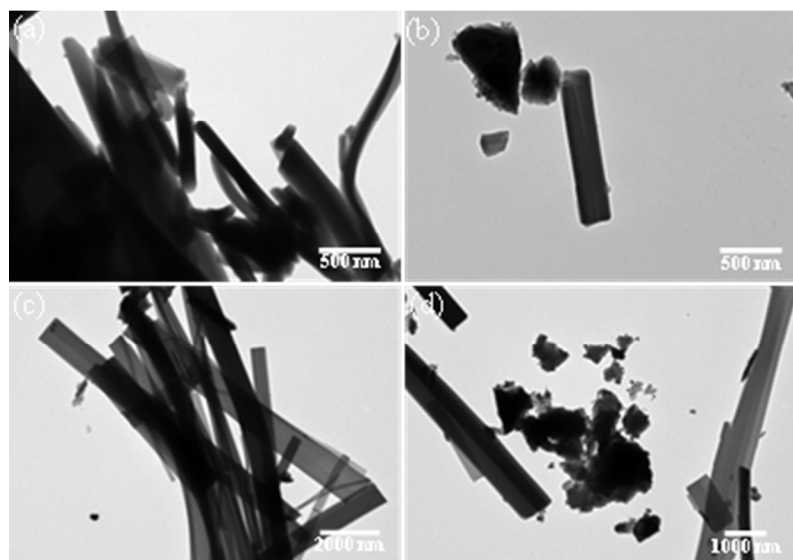

Fig. S7 TEM images of pristine CuBTC after washing with water at one place (a), and at another place of same sample (b), IL impregnated CuBTC after washing with water (c), and at another place of same sample (d).

## References

- 1 <http://www.crystallography.net/>. The CIF file of  $\text{Cu}_2\text{SO}_4$  (COD ID:9009694),  $\text{CuSO}_4 \cdot 5\text{H}_2\text{O}$  (COD ID:1010527),  $\text{CuO}$  (COD ID: 9008961),  $\text{Cu}(\text{OH})_2$  (COD ID: 9007849), and  $\text{Cu}_2\text{O}$  (COD ID:1010941) were taken from Crystallography Open Database (COD).
- 2 Fan, Z.-Z.; Lib, X.-H.; Wang, G.-P. Trimesic Acid Dihydrate. *Acta Crystallogr. Sect. E.-Struct Rep. Online*, **2005**, E61, o1607-o1608.
- 3 Duchamp, D. J.; Marsh, R. E. The Crystal Structure of Trimesic Acid (Benzene-1,3,5-Tri Carboxylic Acid). *Acta Crystallogr. Sect. B-Struct. Sci.*, **1969**, B25, 5-19.
- 4 The CIF file of  $\text{Cu}_2(\text{CH}_3\text{CO}_2)_4 \cdot 2\text{H}_2\text{O}$  was taken from [http://physical-chemistry.scb.uwa.edu.au/tonto/wiki/index.php/Metal\\_hydrates.cif](http://physical-chemistry.scb.uwa.edu.au/tonto/wiki/index.php/Metal_hydrates.cif).
